# Supplementary material for: Polarization-dependent deformation in light responsive polymers doped by dichroic dyes
Source: Royal Society of Chemistry journal article supplement (doi:10.1039/c8sm01954a), 2018-11-26
Supplement: c8sm01954a3.pdf [file c8sm01954a3.pdf]

## **Electronic supplementary information (ESI)**

### **Polarization-dependent deformation in light responsive polymers doped by dichroic dyes**

D. Martella,\* S. Nocentini, F. Micheletti, D. S. Wiersma and C. Parmeggiani\*

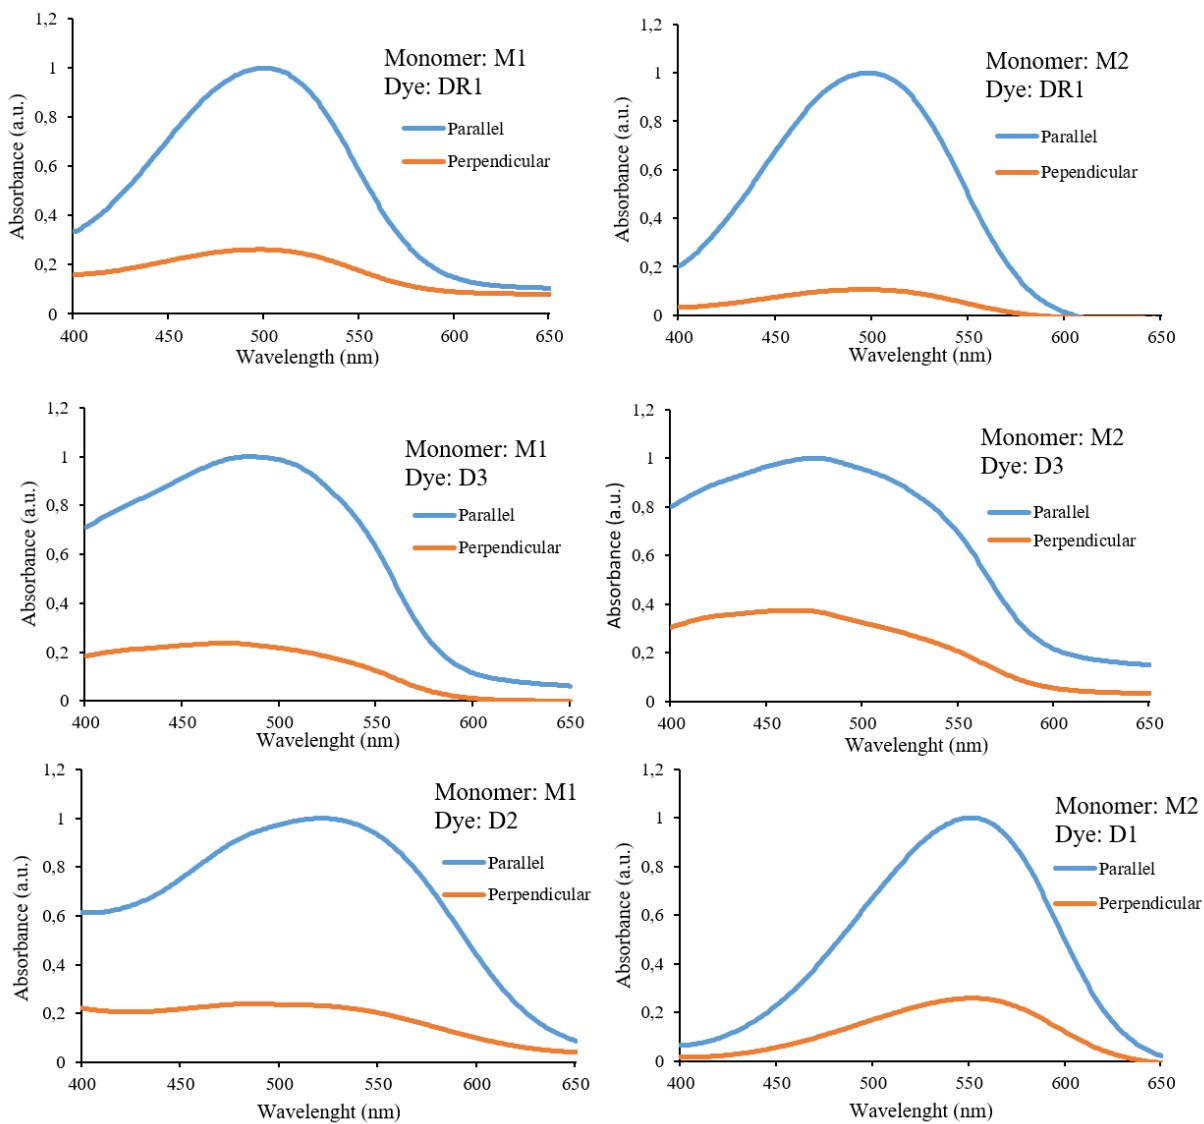

**Figure S1** – Polarized absorption spectra of LCN films.

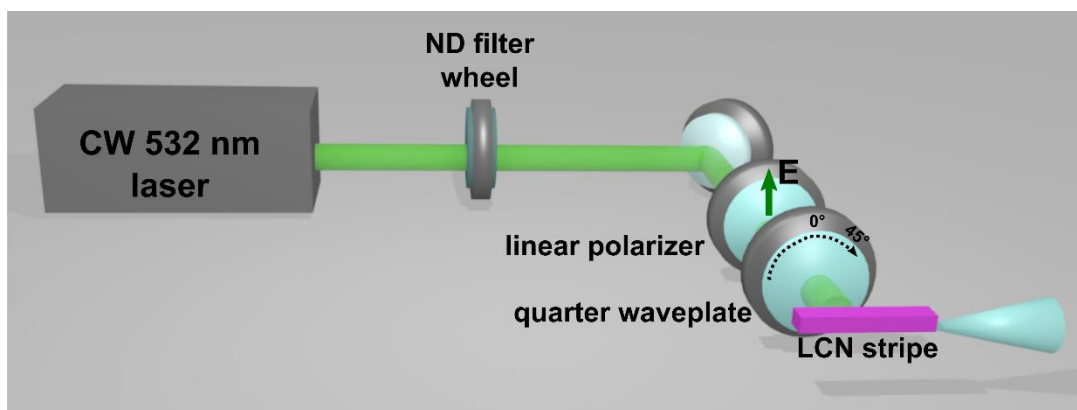

**Figure S2** – Scheme of the setup for light-driven LCN deformation.

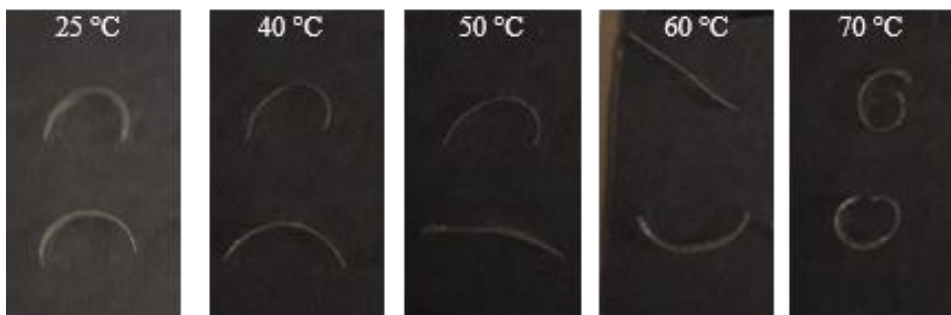

**Figure S3** – Deformation of two splayed LCNs under homogeneous heating. Two strips (1 cm long, along the rubbing direction, 2mm wide) are cut from materials having the same formulation of LCN1\_1 (first cantilever from the top) and LCN2\_2 (second cantilever from the top) without the azodye. LCNs are heated on a hotstage and optical images at different temperatures are here reported. At room temperature, both strips present a bent shape with curvature towards the homeotropic side. Increasing the temperature, both materials first become flat and then, change their curvature toward the homogeneous planar side, as expected. LCE2\_2 matrix demonstrates a slight higher thermal sensitivity presenting the inversion of curvature at around 60 °C, temperature at which LCN1\_1 still results flat.

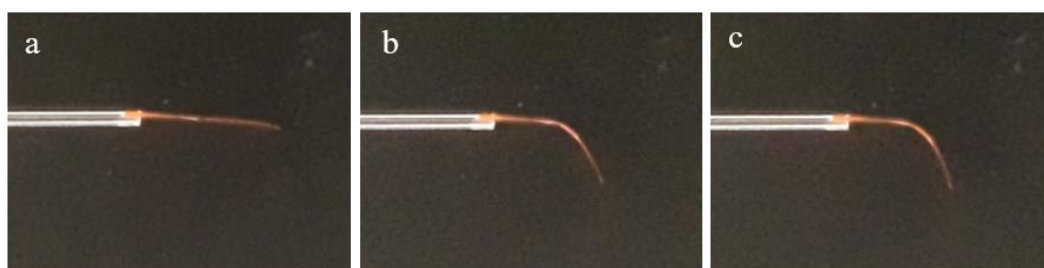

**Figure S4** – Light induced deformation in polydomain LCNs: a strip of polydomain LCN2\_2 is held by a glass capillary (laser off) (a) and then irradiated with green light from the top (b). After switching off the laser, the strip does not recover the original position (c).

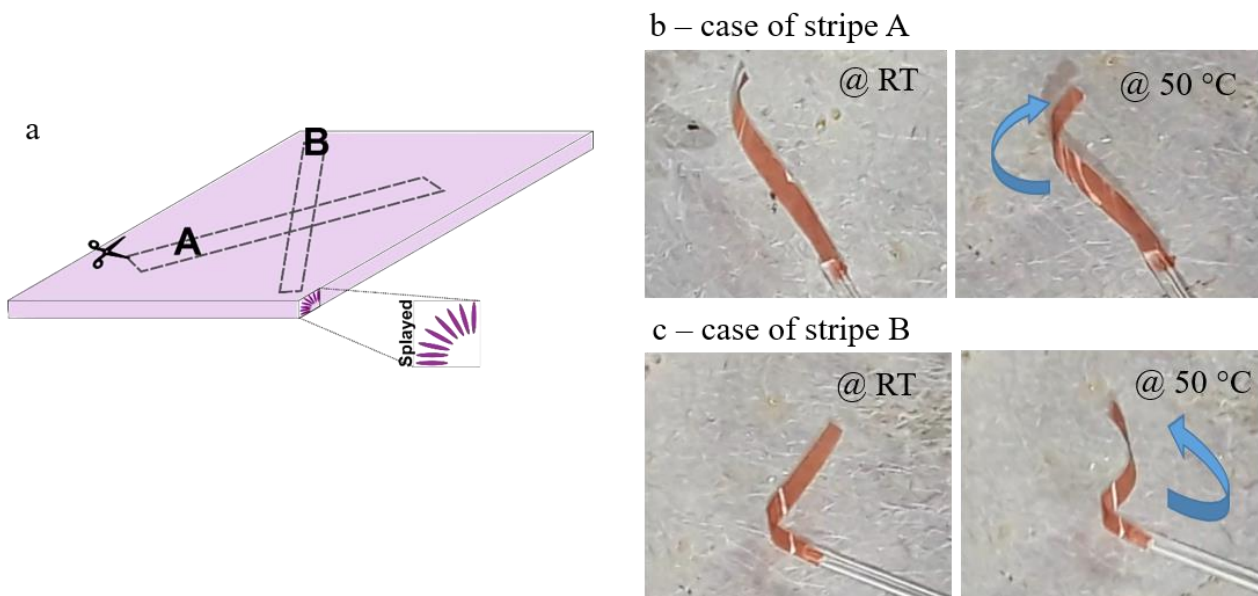

**Figure S5** – Out of plane deformation in a splayed LCN. a) Graphic representation of different cuts realized at  $45^\circ$  in respect to the rubbing direction able to induce an out of plane deformation; b) deformation of LCN 2\_2 cut following mask A: heating of the strip causes an anti-clockwise out of plane deformation; c) deformation of LCN 2\_2 cut following mask B: heating of the strip causes a clockwise out of plane deformation.

**Movie S1** – A strips of LCN1\_1 is irradiated by a green laser with polarization perpendicular to the rubbing direction and then, the polarization is rotated. After switching off the laser, the material returns in the original position.

**Movie S2** – A strips of LCN 2\_2 is irradiated by a green laser with polarization perpendicular to the rubbing direction and then, the polarization is rotated demonstrating different bending. After switching off the laser, the material returns in the original position.
